# Supplementary material for: Notoginsenoside R1 inhibits vascular smooth muscle cell proliferation, migration and neointimal hyperplasia through PI3K/Akt signaling
Source: PubMed Central journal article supplement (PMC5953917; doi:10.1038/s41598-018-25874-y), 2018-05-15
Supplement: 41598_2018_25874_MOESM1_ESM.pdf [file 41598_2018_25874_MOESM1_ESM.pdf]

**Notoginsenoside R1 inhibits vascular smooth muscle cell proliferation, migration  
and neointimal hyperplasia through PI3K/Akt signaling**

Haihong Fang<sup>1,2,3</sup>, Shilin Yang<sup>1</sup>, Yingying Luo<sup>1,2</sup>, Cheng Zhang<sup>2</sup>, Yi Rao<sup>1</sup>, Renjing Liu<sup>4,5</sup>,  
Yulin Feng<sup>1</sup>, Jun Yu<sup>1,2,\*</sup>

<sup>1</sup>Center for translational Medicine, Jiangxi University of Traditional Chinese Medicine, Nanchang, Jiangxi 330002, China; <sup>2</sup>Department of Physiology and Center for Metabolic Disease Research, Lewis Katz School of Medicine, Temple University, Philadelphia, PA19140, USA; <sup>3</sup>School of Pharmacy, Jiangxi Science and Technology Normal University, Nanchang, Jiangxi 330013, China; <sup>4</sup>Agnes Ginges Laboratory for Diseases of the Aorta, Centenary Institute, University of Sydney, Sydney, Australia; <sup>5</sup>Sydney Medical School, University of Sydney, Sydney, Australia

**Running title:** NGR1 reduces neointimal hyperplasia

**\*Corresponding author:**

Jun Yu, MD

Department of Physiology and Center for Metabolic Disease Research, Lewis Katz School of Medicine, Temple University, Philadelphia, PA19140, USA.

Tel: 215-707-3286; Fax: 215-707-5737; Email: jun.yu@temple.edu

## Supplement Figure 1

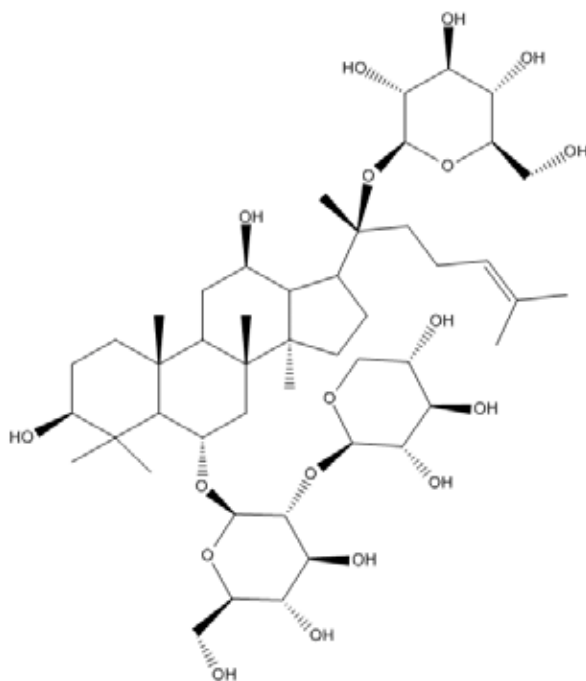

Supplement Figure 1. The chemical structure of NGR1.

## Supplement Figure 2

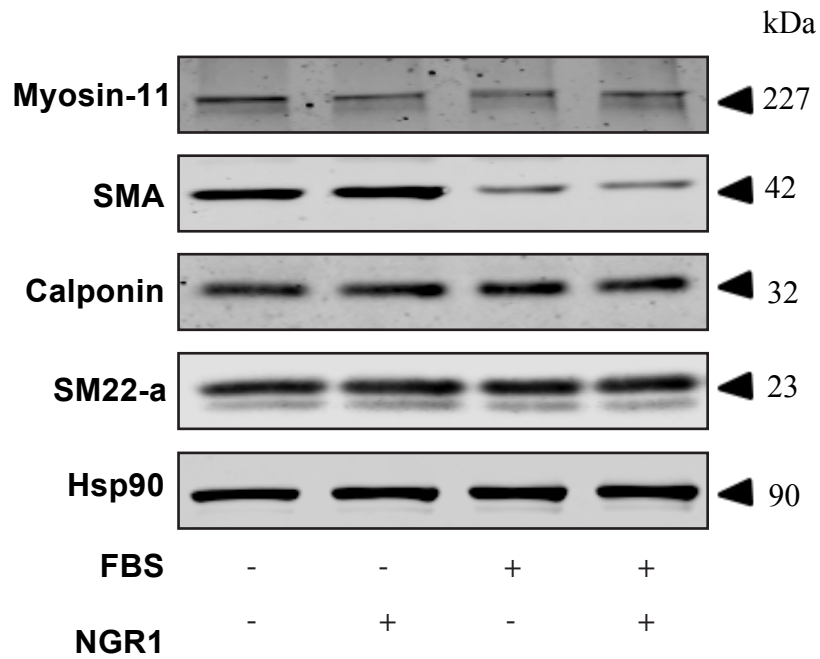

Supplement Figure 2. NGR1 treatment does not change VSMC contractile protein expression. Western blot analysis of cell lysate of hCASMCs that were treated with NGR1 for 24hrs and then stimulated with or without serum for 24hrs. The protein expression levels of Myosin-11, SMA, Calponin and SM22 alpha were blotted. Hsp90 was used as loading control. Representative western blots from 3 experiments are shown.

### Supplement Figure 3

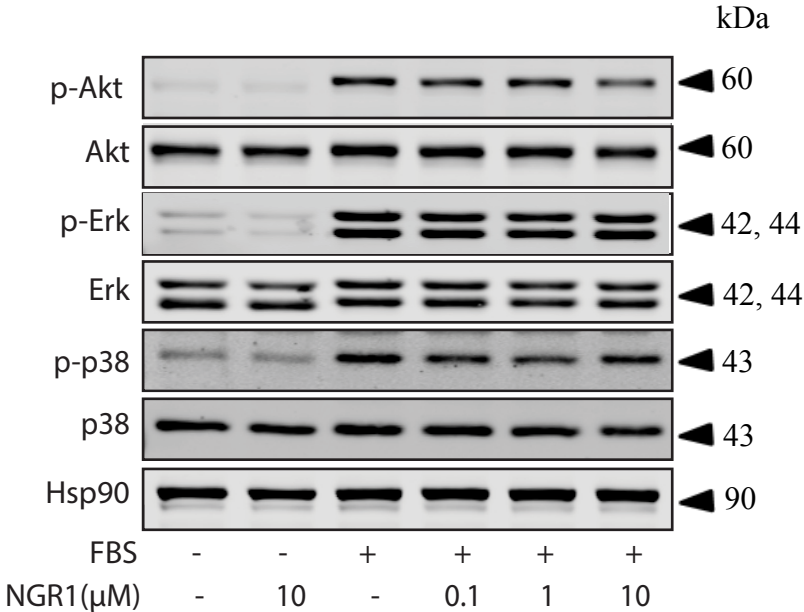

Supplement Figure 3. NGR1 inhibits serum-induced hCASMC proliferation and migration specifically through PI3K/Akt signaling pathway in dose-dependent manner. Western blot analysis of hCASMCs that were treated with different concentration of NGR1 (0, 0.1, 1, 10 μM) for 24hrs and stimulated with 10 % FBS for 15 min. The protein expression levels of p-Akt/Akt, p-ERK/ERK, p-p38/p38 were blotted. Hsp90 was used as loading control. Representative western blots from 3 experiments are shown.

## Supplement Figure 4

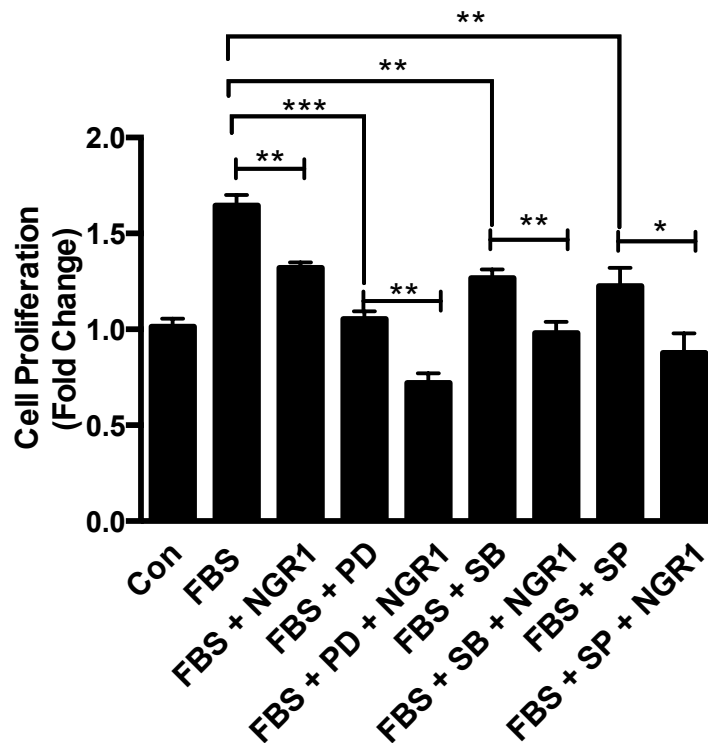

Supplement Figure 4. MAPK small molecule inhibitors doses not constraint NGR1's inhibitory effect on hCASMCM proliferation.

Quiescent hCASMCMs were treated with NGR1 (10  $\mu$ M) for 24hrs and incubated with PD98059 (50  $\mu$ M), SB203580 (20  $\mu$ M) or SP600125 (20  $\mu$ M) in combination of NGR1 (10  $\mu$ M) or vehicle 48hrs. Cells proliferation was determined by MTT assay. N=3 for each condition. Data shown are means  $\pm$  SEM. \*P < 0.05; \*\*P < 0.01; \*\*\* P < 0.001.

## Supplement Figure 5

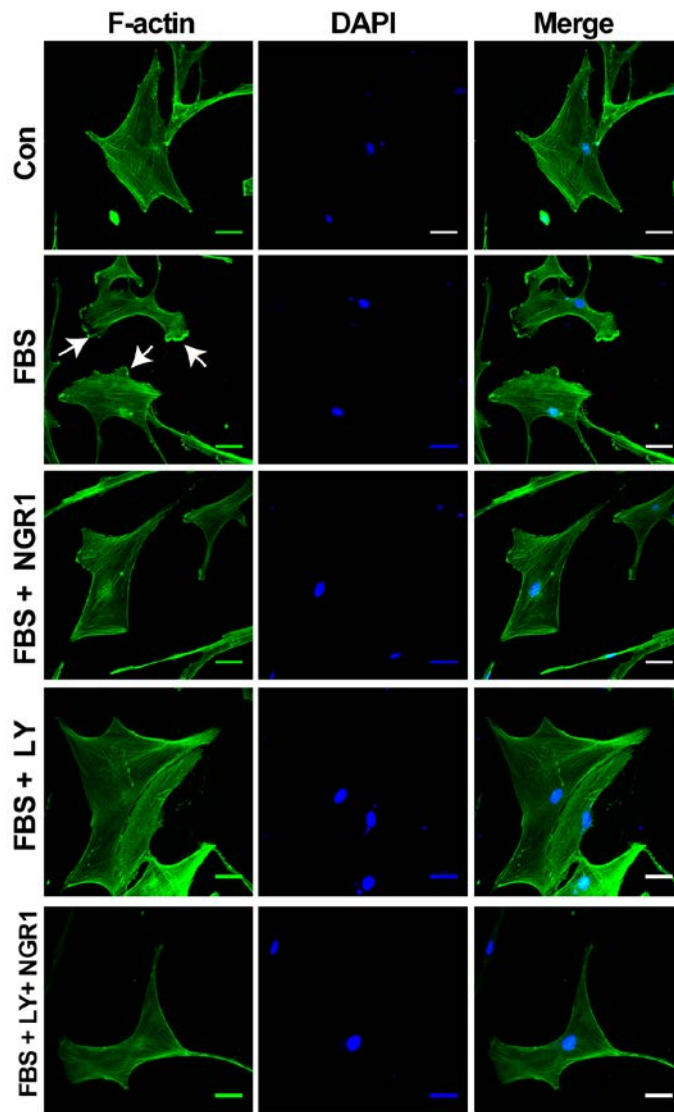

Supplement Figure 5. Representative images of F-actin (Alexa-488-tagged phalloidin) and DAPI stained hCASM cells that were non-treated (Con) or treated with FBS, FBS + NGR1 (10  $\mu$ M), FBS + LY294002 (20  $\mu$ M), or FBS + LY294002 + NGR1. Lamellipodia are indicated by the white arrows. Scale bar, 2  $\mu$ m.

Original western blotting images for Fig. 4A.

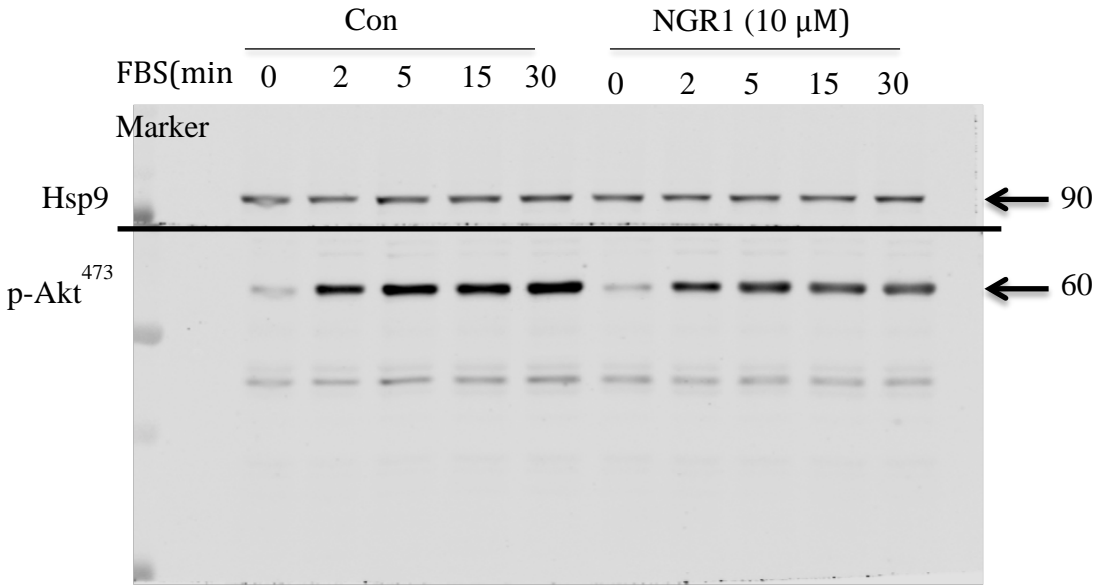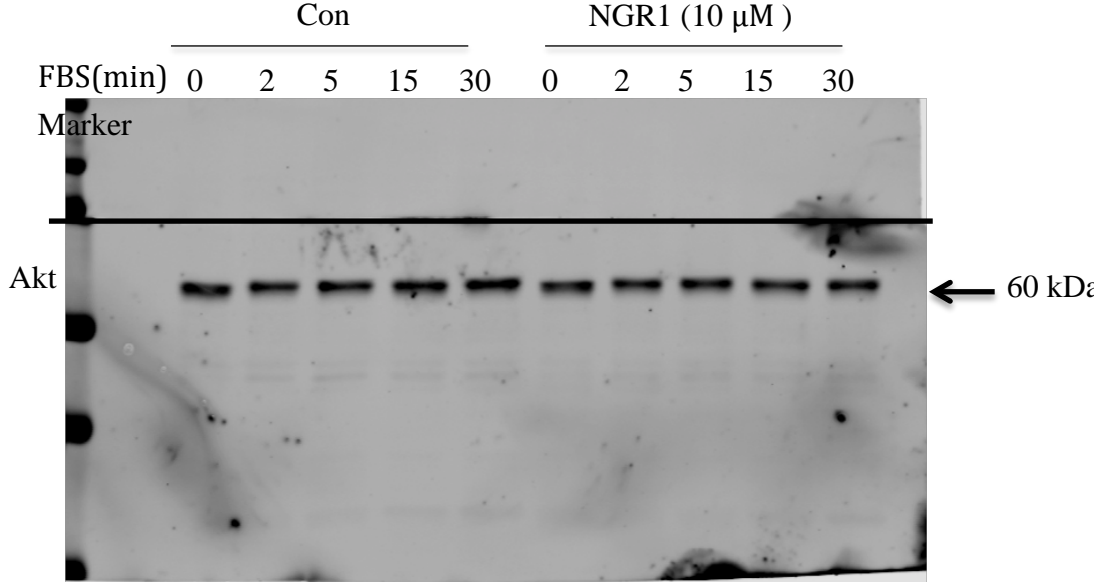

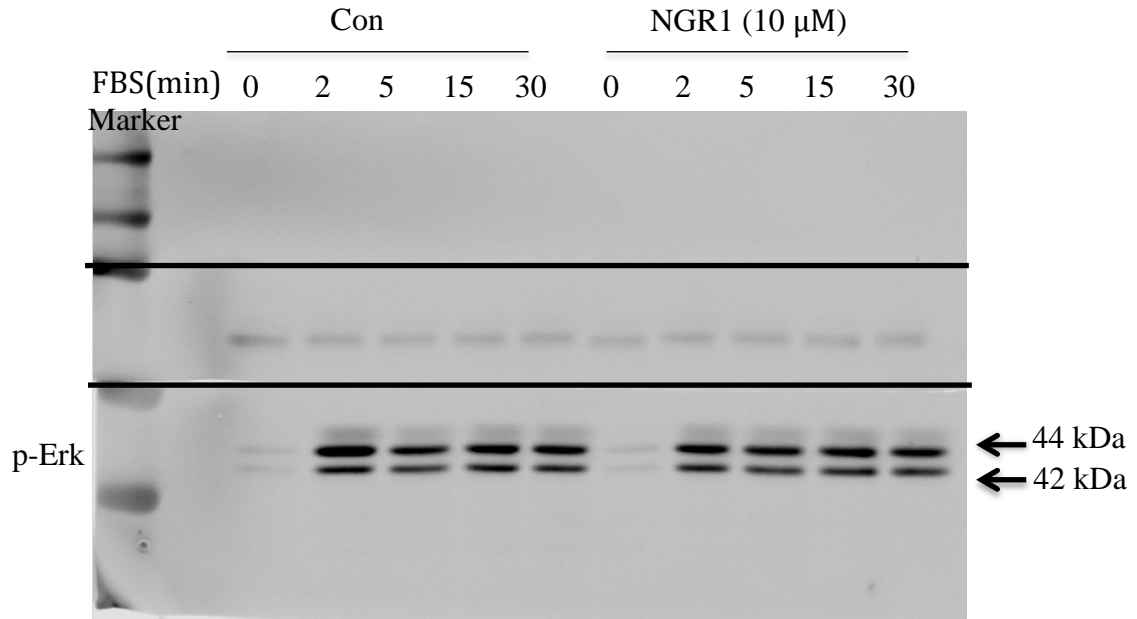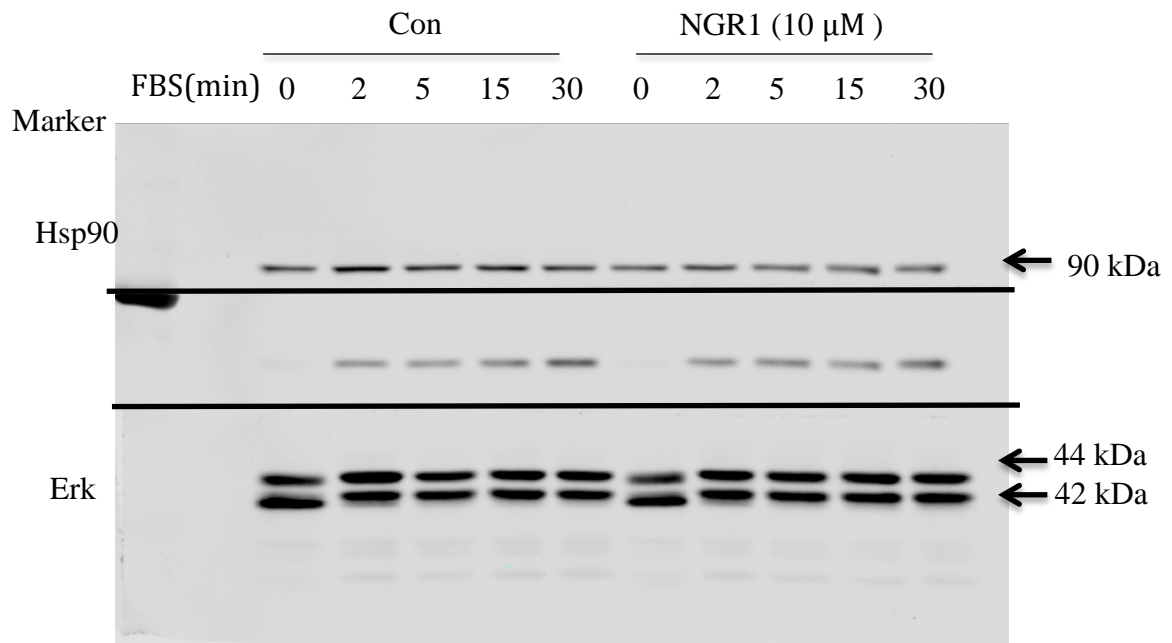



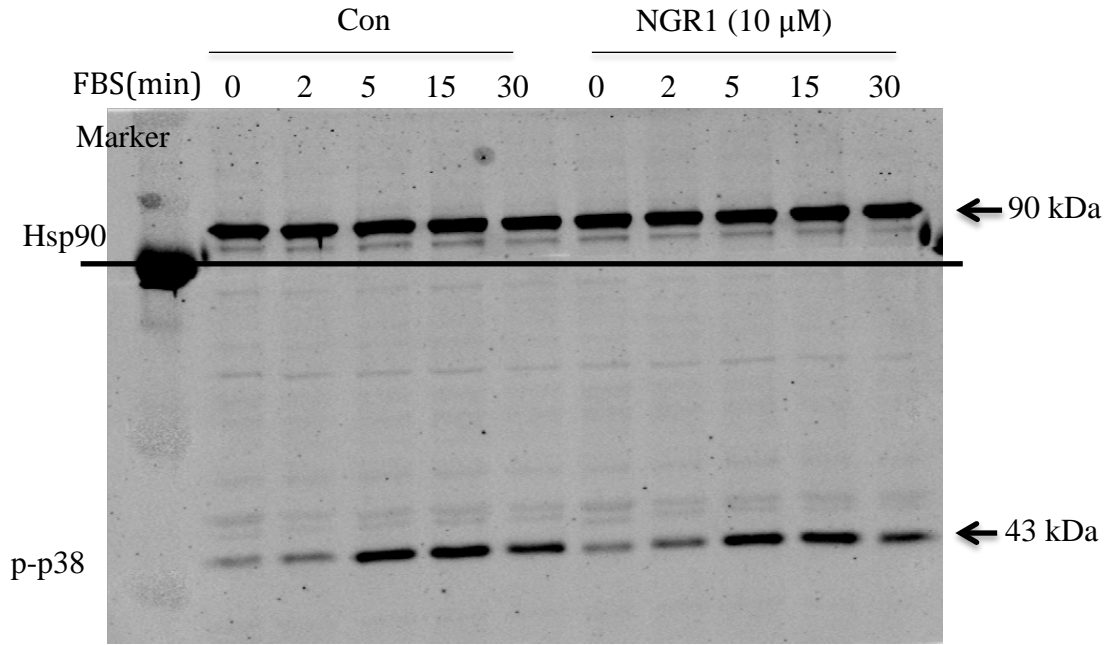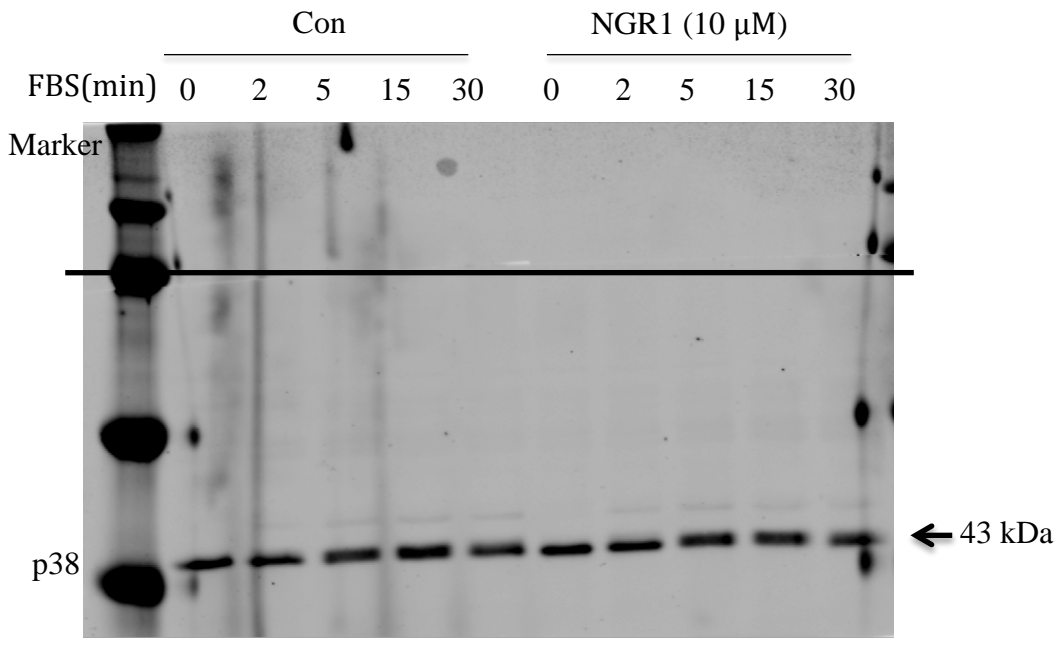

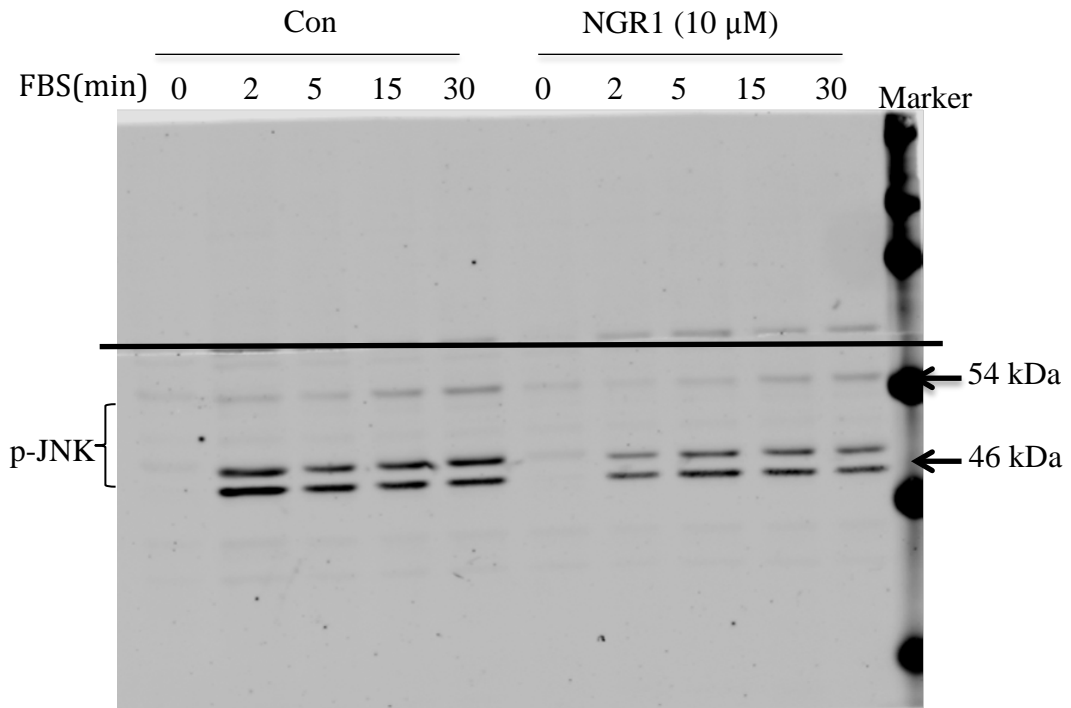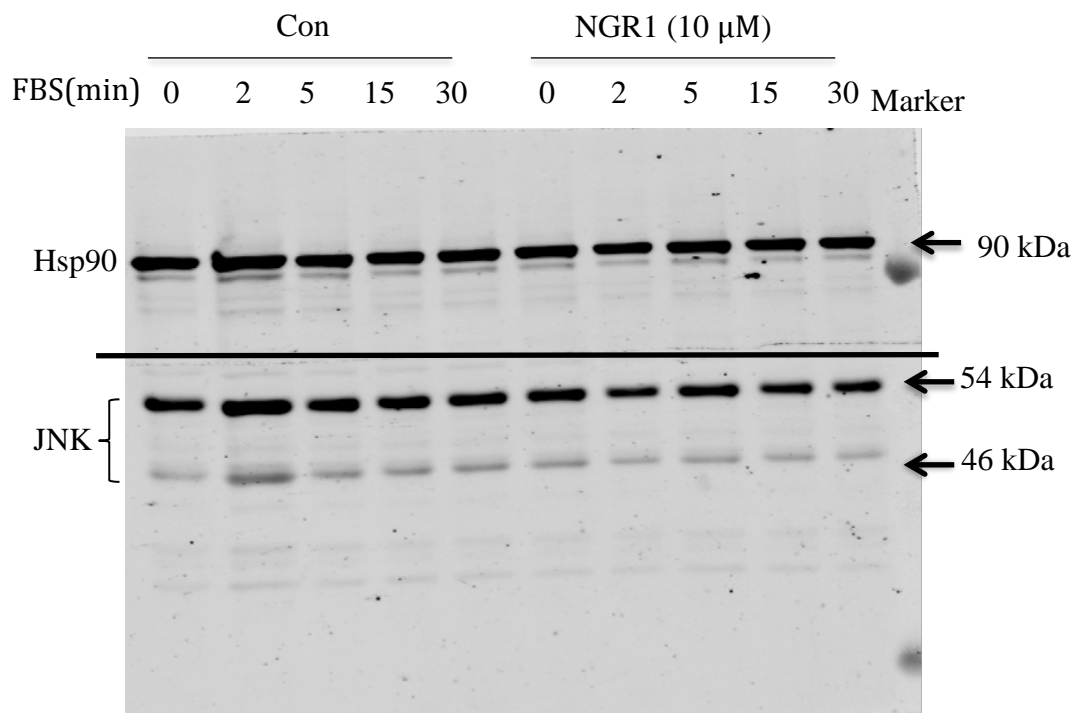

Original western blotting images for Fig. 4E.

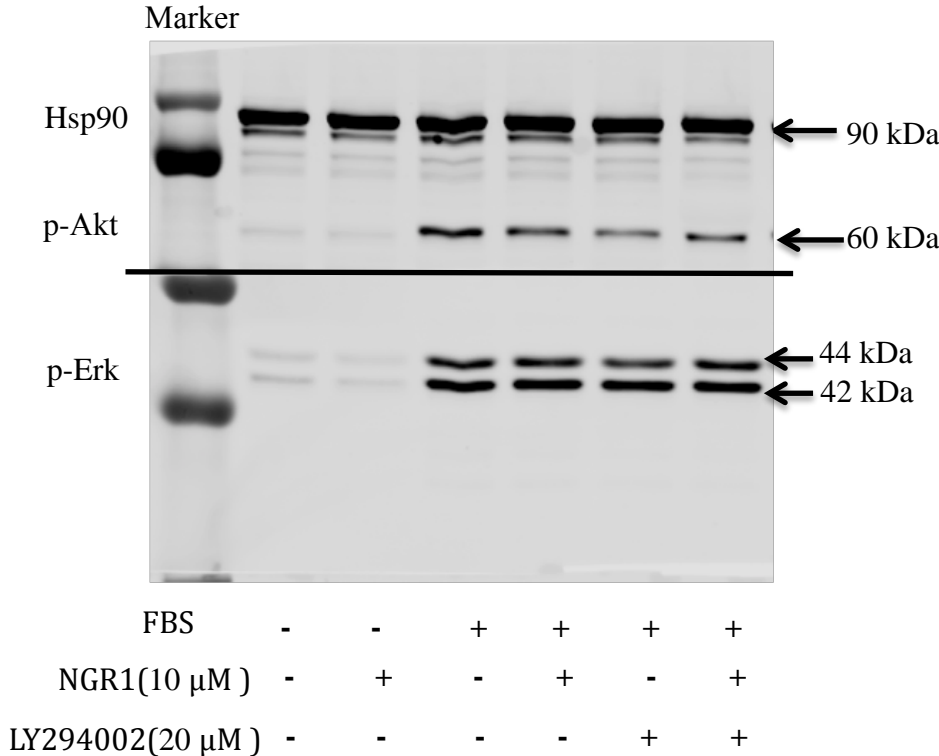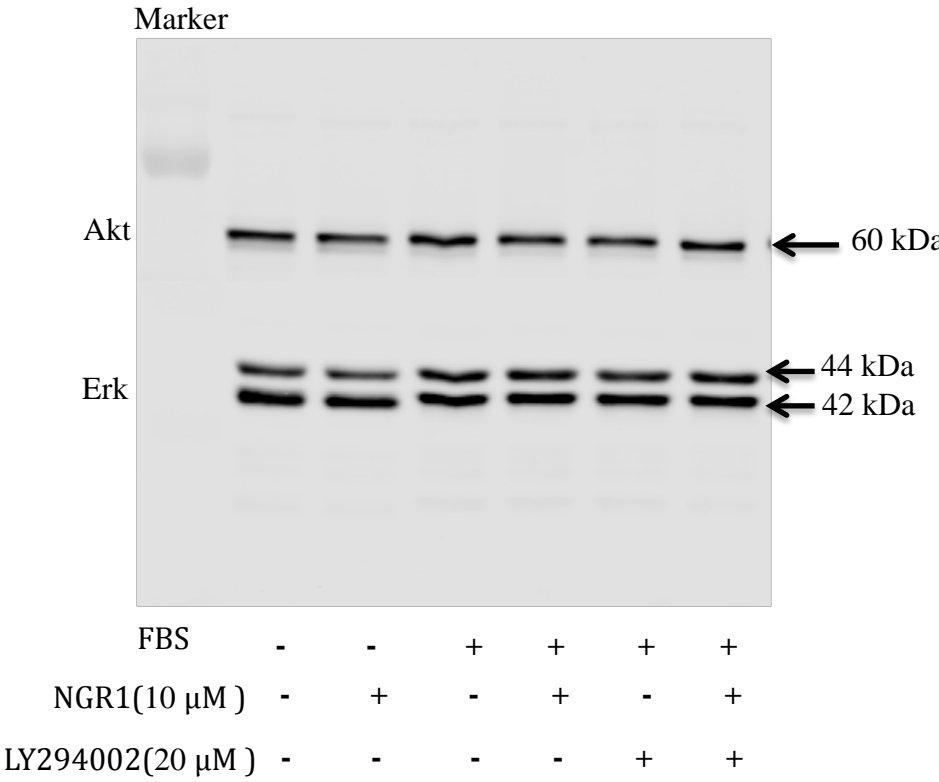

Original western blotting images for supplementary Fig. 2.

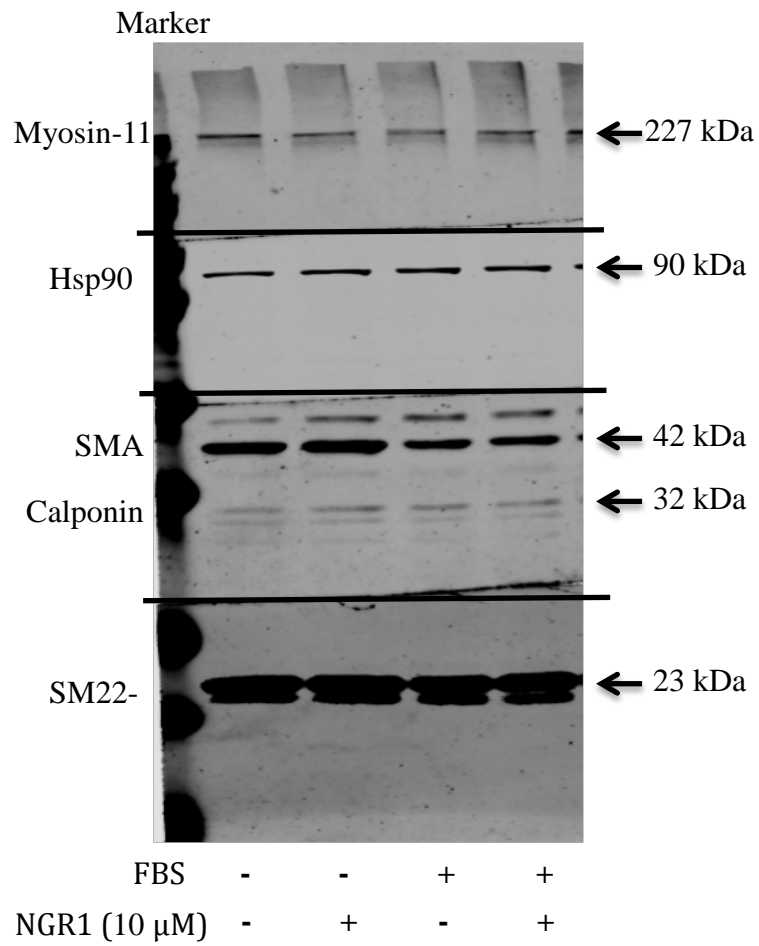

Original western blotting images for supplementary Fig. 3.

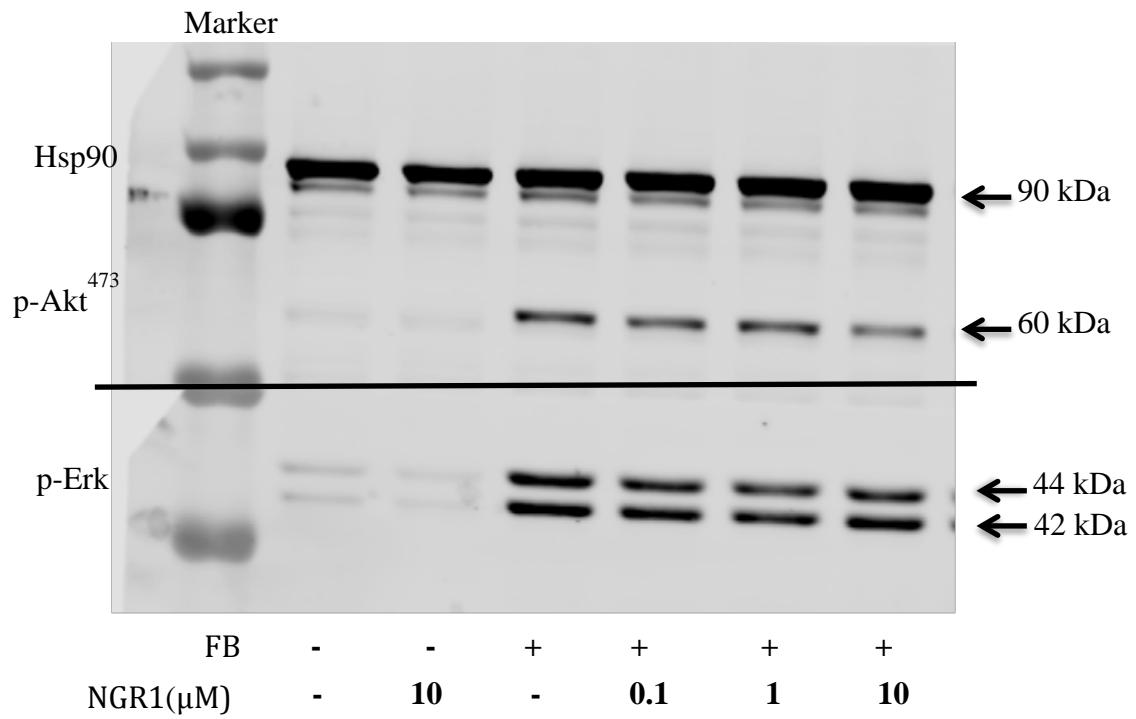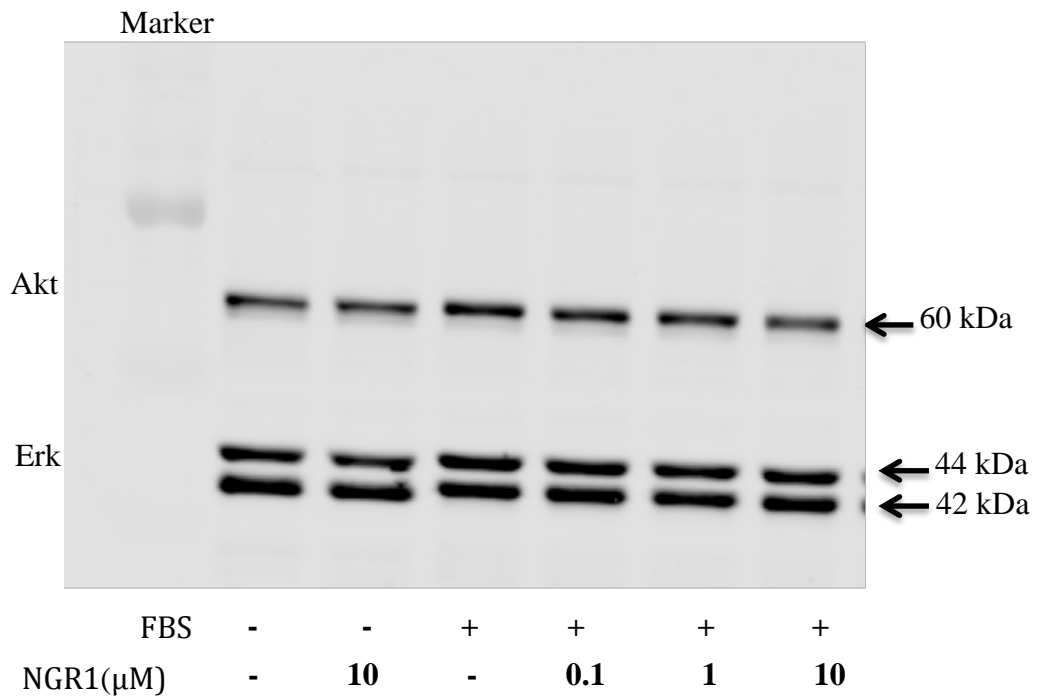

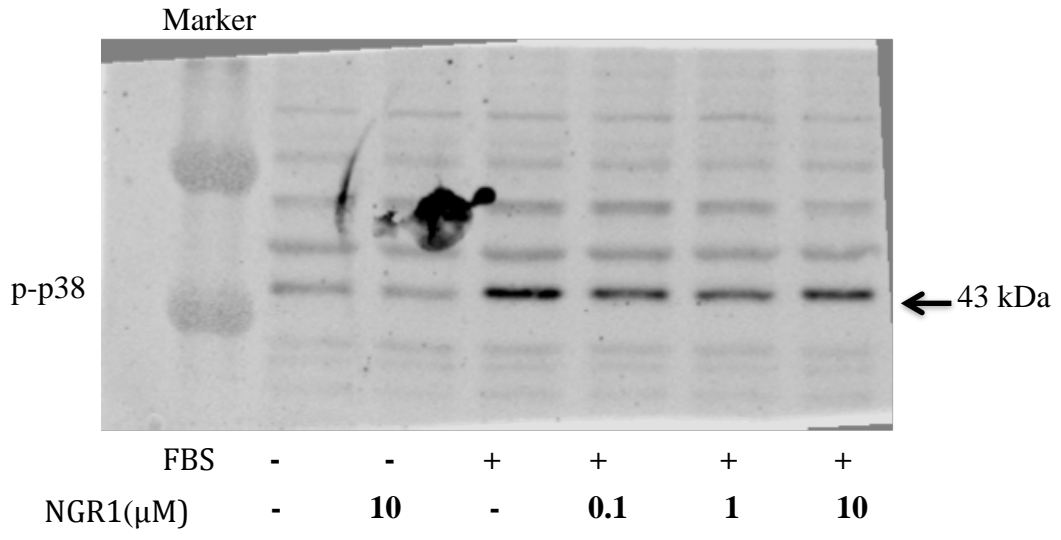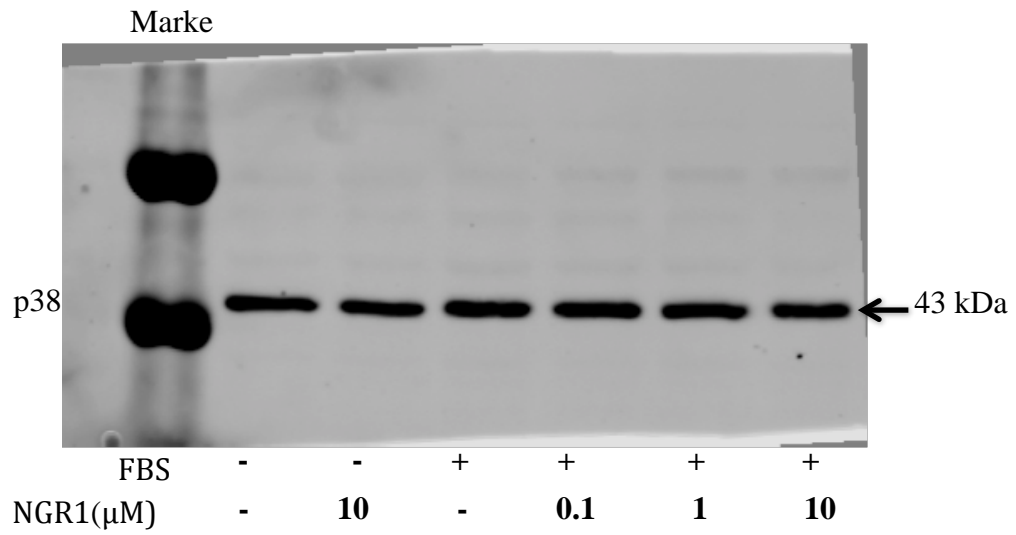

**Supplement Table 1: Antibody list**

| <b>Antibody</b>                                          | <b>Company</b> | <b>Catalog #</b> | <b>Species</b> | <b>Dilution</b> | <b>Application</b> |
|----------------------------------------------------------|----------------|------------------|----------------|-----------------|--------------------|
| Hsp90                                                    | BD             | 610419           | Mouse          | 1:1000          | Western            |
| p-Akt(Ser473)                                            | Cell Signaling | 4051             | Mouse          | 1:1000          | Western            |
| Akt                                                      | Cell Signaling | 4685             | Rabbit         | 1:1000          | Western            |
| p-Erk                                                    | Cell Signaling | 4377             | Rabbit         | 1:1000          | Western            |
| Erk                                                      | Cell Signaling | 4696             | Mouse          | 1:1000          | Western            |
| p-p38                                                    | Cell Signaling | 9216             | Mouse          | 1:500           | Western            |
| p38                                                      | Cell Signaling | 9212             | Rabbit         | 1:500           | Western            |
| p-JNK                                                    | Cell Signaling | 4668             | Rabbit         | 1:1000          | Western            |
| JNK                                                      | Santa Cruz     | sc-7345          | Mouse          | 1:500           | Western            |
| Myosin-11                                                | Abcam          | ab53219          | Rabbit         | 1:1000          | Western            |
| Calponin                                                 | Abcam          | ab46794          | Rabbit         | 1:2000          | Western            |
| SM22- $\alpha$                                           | Abcam          | ab14106          | Rabbit         | 1:1000          | Western            |
| SM- $\alpha$ -actin                                      | DAKO           | M0851            | Mouse          | 1:1000          | Western            |
| IRDYE 680RD second antibody                              | Odyssey        | 926-68073        | Rabbit         | 1:5000          | Western            |
| IRDYE 800CW second antibody                              | Odyssey        | 926-32212        | Mouse          | 1:5000          | Western            |
| Anti-BrdU                                                | Abcam          | ab6326           | Rat            | 1:40            | IF                 |
| FITC- conjugated phalloidin (F-actin)                    | Invitrogen     | A12379           |                | 1:100           | IF                 |
| Alexa Fluor® 594 conjugate Deoxyribonuclease I (G-actin) | Invitrogen     | D12372           |                | 1:200           | IF                 |

**Supplement Table 2: Other reagent list**

| <b>Reagents</b>                                  | <b>Company</b>                                                                             | <b>Catalog #</b> |
|--------------------------------------------------|--------------------------------------------------------------------------------------------|------------------|
| Notoginsenoside R1                               | Chinese National Institute for<br>the Control of Pharmaceutical<br>and Biological Products | 110745           |
| rhEGF                                            | Promega                                                                                    | G5021            |
| rhFGF                                            | Promega                                                                                    | G5071            |
| BrdU                                             | Sigma-Aldrich                                                                              | 19160            |
| LY294002                                         | Sigma-Aldrich                                                                              | L9908            |
| PD98059                                          | Sigma-Aldrich                                                                              | P215             |
| SB203580                                         | Sigma-Aldrich                                                                              | S8307            |
| SP600125                                         | Sigma-Aldrich                                                                              | S5567            |
| TUNEL Andy Fluor™ 488<br>Apoptosis Detection Kit | GeneCopia                                                                                  | A050             |
